# Supplementary material
Source: PubMed Central journal article supplement (PMC7439261)
Supplement: ao0c01640_si_001.pdf [file ao0c01640_si_001.pdf]

## Supporting Information

### **Growth-Inhibiting, Bactericidal, Antibiofilm and Urease Inhibitory Activities of *Hibiscus rosa sinensis* L. Flower Constituents toward Antibiotic Sensitive- and Resistant-Strains of *Helicobacter pylori***

Hieu Tran Trung,<sup>\*,‡</sup> Hoa Truong Thi Huynh,<sup>‡</sup> Linh Nguyen Thi Thuy,<sup>||</sup> Hoang Nguyen Van Minh,<sup>§</sup> My-Nuong Thi Nguyen,<sup>‡</sup> and My Ngan Luong Thi <sup>\*,‡</sup>

<sup>‡</sup> Faculty of Biology and Biotechnology, University of Science, Vietnam National University, 227 Nguyen Van Cu Street, District 5, Ho Chi Minh City 700000, Vietnam

<sup>‡</sup> Central Laboratory for Analysis, University of Science, Vietnam National University, 227 Nguyen Van Cu Street, District 5, Ho Chi Minh City 700000, Vietnam

<sup>||</sup> Faculty of Chemistry, University of Science, Vietnam National University, 227 Nguyen Van Cu Street, District 5, Ho Chi Minh City 700000, Vietnam

<sup>§</sup> Oxford University Clinical Research Unit, Hospital for Tropical Diseases, 764 Vo Van Kiet Street, District 5, Ho Chi Minh City 700000, Vietnam

\*Email: [hieutt@hcmus.edu.vn](mailto:hieutt@hcmus.edu.vn), Tel: (+84) 028 38304093.

\*Email: [ltmngan@hcmus.edu.vn](mailto:ltmngan@hcmus.edu.vn)

## Supporting information content

**Table S1.**  $^1\text{H}$ -NMR,  $^{13}\text{C}$ -NMR, and HMBC data of four principles isolated from *H. rosa sinensis* flower

**Figure S1.**  $^1\text{H}$  -  $^{13}\text{C}$  HMBC-correlations of protocatechuic acid (PCA) (A), naringenin (NRG) (B), luteolin (LUT) (C), and myricetin MCT) (D)

**Figure S2.** Scheme of isolation of four principles derived from *H. rosa sinensis* flower

**Table S1. <sup>1</sup>H-NMR, <sup>13</sup>C-NMR, and HMBC data of four principles isolated from *H. rosa sinensis* flower**

| Position | Principle 1 (PCA)        |                                        |                                          | Principle 2 (NRG)        |                                               |                                          |
|----------|--------------------------|----------------------------------------|------------------------------------------|--------------------------|-----------------------------------------------|------------------------------------------|
|          | <sup>13</sup> C<br>(ppm) | <sup>1</sup> H<br>(ppm, <i>J</i> = Hz) | HMBC<br><sup>1</sup> H → <sup>13</sup> C | <sup>13</sup> C<br>(ppm) | <sup>1</sup> H<br>(ppm, <i>J</i> = Hz)        | HMBC<br><sup>1</sup> H → <sup>13</sup> C |
| 1        | 124.01                   | -                                      | -                                        |                          |                                               |                                          |
| 2        | 116.50                   | 7.46 (s)                               | 3, 4, 6, 7                               | 78.86                    | 5.37 (dd, 12.9, 3.0)                          | 1', 3, 4, 9                              |
| 3        | 144.43                   | -                                      | -                                        | 42.64                    | 3.10 (dd, 17.0, 12.9)<br>2.66 (dd, 17.0, 3.0) | 1', 2, 4<br>1', 4, 10                    |
| 4        | 149.36                   | -                                      | -                                        | 195.58                   | -                                             | -                                        |
| 5        | 114.33                   | 6.79 (d, 8)                            | 1, 3, 4                                  | 164.45                   | -                                             | -                                        |
| 6        | 122.35                   | 7.42 (d, 8)                            | 2, 4, 7                                  | 96.55                    | 5.93 (d, 2.1)                                 | 5, 7, 8, 10                              |
| 7        | 170.59                   | -                                      | -                                        | 169.15                   | -                                             | -                                        |
| 8        |                          |                                        |                                          | 95.55                    | 5.92 (d, 2.1)                                 | 6, 7, 9, 10                              |
| 9        |                          |                                        |                                          | 163.39                   | -                                             | -                                        |
| 10       |                          |                                        |                                          | 101.59                   | -                                             | -                                        |
| 1'       |                          |                                        |                                          | 128.04                   | -                                             | -                                        |
| 2'       |                          |                                        |                                          | 129.99                   | 7.35 (d, 8.5)                                 | 3', 4', 6'                               |
| 3'       |                          |                                        |                                          | 115.34                   | 6.88 (d, 8.5)                                 | 1', 2', 4', 5'                           |
| 4'       |                          |                                        |                                          | 157.91                   | -                                             | -                                        |
| 5'       |                          |                                        |                                          | 115.34                   | 6.88 (d, 8.5)                                 | 1', 3', 4', 6'                           |
| 6'       |                          |                                        |                                          | 129.99                   | 7.35 (d, 8.5)                                 | 2', 4', 5'                               |

**Table S1. (cont.)**

| Position | Principle 3 (LUT)        |                                        |                                          | Principle 4 (MCT)        |                                        |                                          |
|----------|--------------------------|----------------------------------------|------------------------------------------|--------------------------|----------------------------------------|------------------------------------------|
|          | <sup>13</sup> C<br>(ppm) | <sup>1</sup> H<br>(ppm, <i>J</i> = Hz) | HMBC<br><sup>1</sup> H → <sup>13</sup> C | <sup>13</sup> C<br>(ppm) | <sup>1</sup> H<br>(ppm, <i>J</i> = Hz) | HMBC<br><sup>1</sup> H → <sup>13</sup> C |
| 2        | 164.38                   | -                                      | -                                        | 147.34                   | -                                      | -                                        |
| 3        | 103.36                   | 6.63 (s)                               | 2, 4, 10, 1'                             | 136.36                   | -                                      | -                                        |
| 4        | 182.11                   | -                                      | -                                        | 176.21                   | -                                      | -                                        |
| 5        | 157.78                   | -                                      | -                                        | 161.21                   | -                                      | -                                        |
| 6        | 99.31                    | 6.17 (d, 2.0)                          | 7, 8, 9, 10                              | 98.64                    | 6.16 (d, 2.0)                          | 5, 7, 8, 10                              |
| 7        | 164.61                   | -                                      | -                                        | 164.38                   | -                                      | -                                        |
| 8        | 94.31                    | 6.42 (d, 2.0)                          | 5, 6, 7, 10                              | 93.67                    | 6.35 (d, 2.0)                          | 6, 7, 9, 10                              |
| 9        | 161.96                   | -                                      | -                                        | 156.57                   | -                                      | -                                        |
| 10       | 104.19                   | -                                      | -                                        | 103.45                   | -                                      | -                                        |
| 1'       | 119.44                   | -                                      | -                                        | 121.28                   | -                                      | -                                        |
| 2'       | 122.03                   | 7.40 (d, 2.2)                          | 2, 1', 4', 5' 6                          | 107.68                   | 7.22 (s)                               | 2, 1', 3', 4', 6'                        |
| 3'       | 116.51                   | 6.88 (d, 8.1)                          | 1', 4', 5'                               | 146.20                   | -                                      | -                                        |
| 4'       | 150.17                   | -                                      | -                                        | 136.32                   | -                                      | -                                        |
| 5'       | 146.22                   | -                                      | -                                        | 146.20                   | -                                      | -                                        |
| 6'       | 113.87                   | 7.38 (s)                               | 2, 1', 2', 4', 5'                        | 107.68                   | 7.22 (s)                               | 2, 1', 2', 4', 5'                        |
| 5-OH     | -                        | 12.94 (s)                              | 6, 9, 10                                 | -                        | 12.46 (s)                              | 5, 6, 10                                 |

**A**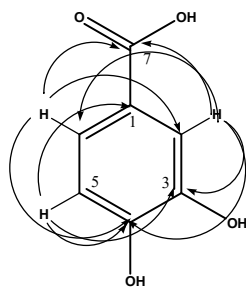**B**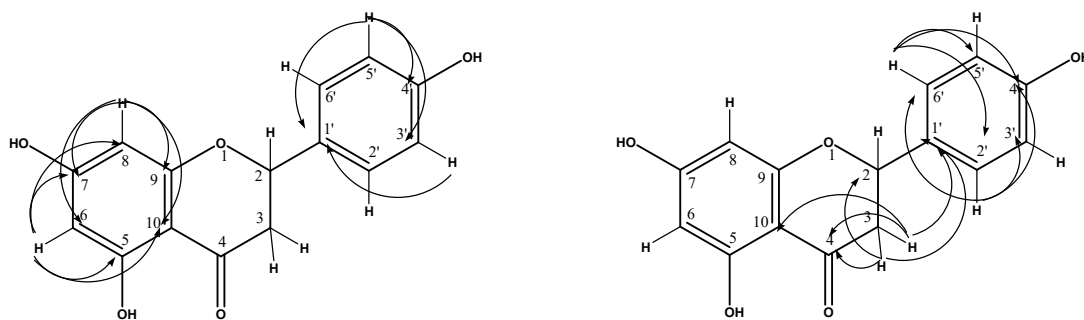**C**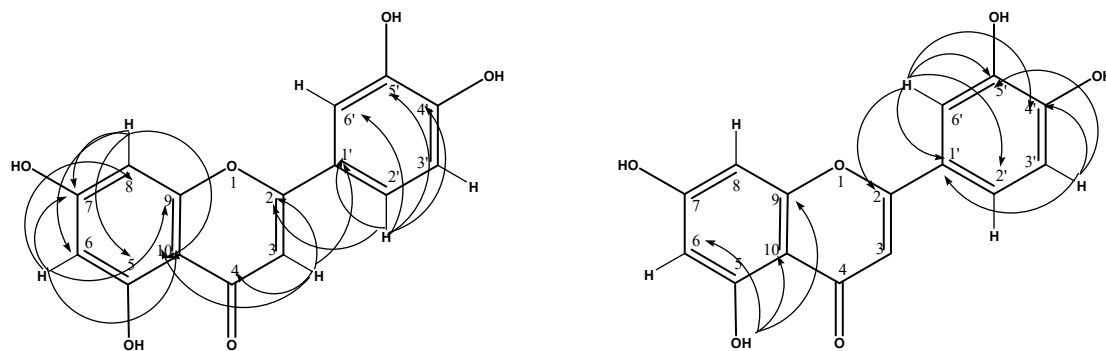**D**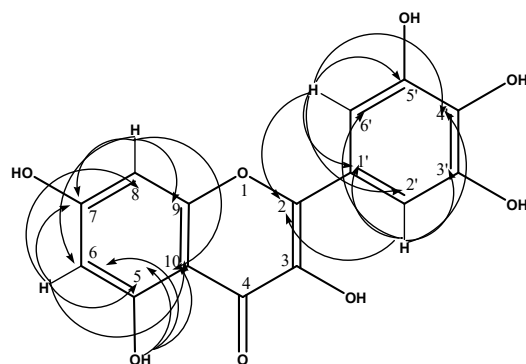

**Figure S1.**  $^1\text{H}$  -  $^{13}\text{C}$  HMBC-correlations of protocatechuic acid (PCA) (A), naringenin (NRG) (B), luteolin (LUT) (C), and myricetin MCT) (D)

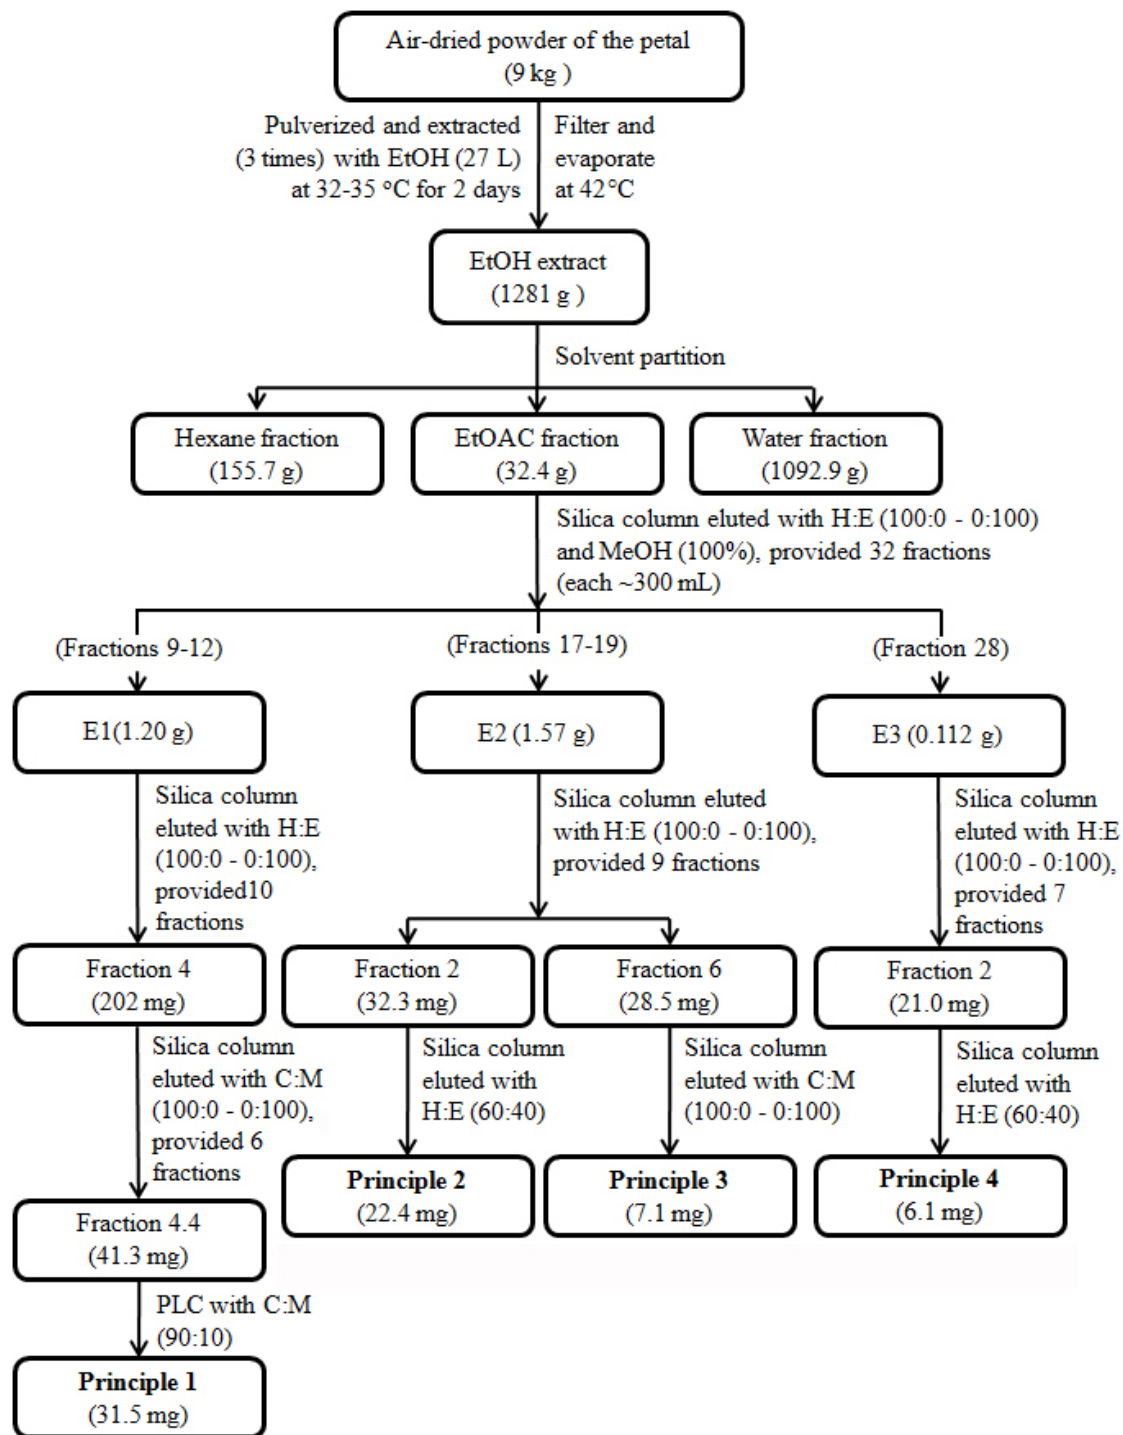

**Figure S2.** Scheme of isolation of four principles derived from *H. rosa sinensis* flower
